# Supplementary material
Source: PubMed Central journal article supplement (PMC2806900)

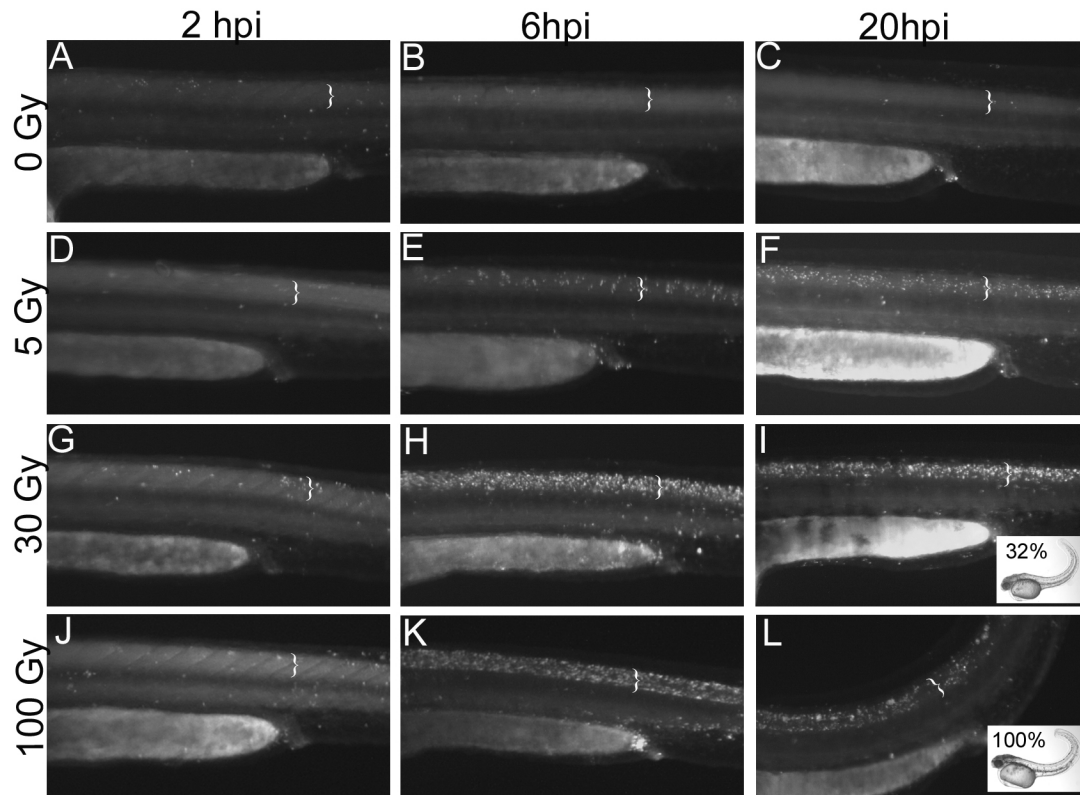

Supplement: supp_3.1-2.45_003749FigS2.pdf [file supp_3.1-2.45_003749FigS2.pdf]
